# Supplementary material for: Quantitative RT-PCR Gene Evaluation and RNA Interference in the Brown Marmorated Stink Bug
Source: PubMed Central journal article supplement (PMC4856283; doi:10.1371/journal.pone.0152730), 2016-05-04
Supplement: pone.0152730.s003.pdf [file pone.0152730.s003.pdf]

>BMSB\_RPS26

GTTTTTATTAACATTAGTTTGAAAAAGATTATTTCTTATCTGGGGTCCACCTTGACGCA  
TCATATCCCTTGGGAAGTTACGCTGAGGAGGTGCTTAATCTTCTCAGCCTTAGAAC  
GATTACGTACTACTTTAGAGTGGATCGCACATGATACACAAATGCAGTTTAGCGTAGA  
GTTTTGGCAATTGGTATGATGAGTAAACACTAGCATCTGTGATGTCTCTCACAGCTGCAG  
CTTCTACAATATTACGGATAACGAATTTCTTGATAGCCTTATCCTTTGGTACACAACGGG  
CACAGTTGGTACACAGGACTGTGTACATGCCCCCTACCGTGTTAGATCTTCCCTCAT  
TCCCTCTTTCTTGGTCAATTGTAATAATATAACAGATATACCCCGAACACGAAGCACTTG  
CTAAGAACCCTACCAAAGCCTTCTGAATGAAAGCTGCGCACTGTGTGCTCTCTAGCTT  
ACAAACTCTTATGGCAATTACGGTATATTTGTTTTTATCTATAATAATAATAGATAA  
TATCTGTTTAAATTTA

>BMSB\_EF1A

GGGCTAGAAAAATACAAATATATATATTCAAATAAATAAAGAGAAGAACTATTCCTCGA  
GGGACTACTTTTTACCCCACTACTTGCCAAACGGGGCCACTGGTAGGAGTTGTGCGCATGT  
TGCAGTCGTCTGTCTTCTTCTGTCTGGCATTGGGAGATATCTTAACGGTCATTGT  
TATATAAACTGCTAAAAAATGCCAAAGAAAAGATTCAATTAACATTGTTTGTCAATGGA  
CACGTAGATTACGTAATCTACTACTGCGCATCTCATTTACAAATGTGGTGGTATC  
GACAAACGTACTATCGAAAAATTCGAGAAAAGAGGCTCAGGAGATGGGCAAAGGATCTTTC  
AAATATGCCTGGGTATTAGACAAGCTTAAAGCTGAACGTGAACGTGGTATCACAATTGAT  
ATTGCCTTATGGAAATTTGAGACTTCCAAATACTACGTCACAAATTAATGATGCCCTGGT  
CACAGAGATTTTCATCAAAAACATGATTACAGGAACCTTCTCAGGCTGATTGTGTGTGTTA  
ATTGTAGTGCAGGCTACTGGTGAATTTGAAGCCGGTATCTCTAAGAATGGACAGACTCGT  
GAGCATGCACTTCTTGCCTTCACTTGGTGTAAAACAATTGATCGTAGGAGTTAACAAA  
ATGATTCAACTGAACCTCTTATTCAGAGAGCAGATTCGAGGAAATCAAAAAGGAAGTA  
TCATCCTACATTAAGAAGATTGGATACAATCCAGCCTCCGTAGCTTTTGTTCCTATTTCT  
GGTTGGCATGGAGACAACATGCTTGAGCCATCTGACAAGATGCCATGGTTCAAGGGGTGG  
GCTATTGAAAGGAAAGAGGCAAAGCTGATGGTAAATGCCTTATTGAAGCTTTGATGCC  
ATTTTACCTCCTAGCAGCTACCCGATAAGGCCCTCAGGCTTCCACTTCAGGATGTGTAC  
AAGATTGGTGGTATTGGAACAGTGCCAGTTGGGCGAGTGGAGACTGGTGTCTTAAACCA  
GGTATGGTTGTCACTTTTGTCTCTGTCAATCTTACCCTGAAGTAAAGTCTGTGAAATG  
CACCACGAAGCCCTCAGGAAGCTGTACCTGGTGACAATGTTGGTTTCAACGTTAAAAAC  
GTCTCTGTGTAAGAATTTGCGTCCGAGGTATGTTGCTGGTGACTCCAAAAACAATCCACCC  
AAGGCTGCTTCTGACTTTACTGCTCAGGTTATCGTATTAATCACCCTGGTCAAGTTTCT  
AATGGATACACTCCCGTACTTGATTGTCACTGCCCCATATTGCTTGCAAATTTGCAGAG  
ATCAAGGAAAAGTGCAGCCGCTGACTGGTAAATCTACTGAAAGCAACCCCAAATCCATC  
AAGTCTGGTATCAGCAGCTTATCAACTTGGTTCCAACCAAAACAATGTGCGTAGAGTCA  
TTCCAAGAGTTCCACCTTTGGGACGTTTTCGCTGTGAGAGACATGAGGCAAACCTGTTGCT  
GTGCGCCTCATCAAGTCTGTAACCAACAAGATATAACAACGGGTAAAGTGACAAAGGCC  
GCCGAGAAGGCACAGAAGAAGAAATAACTAGGTGTGCTGCTGATCAGCAACAGGCAAG  
CCGAACACGCCACCCCTCAGAAATCAGGAAGCTATTACTTAAAACAATATGTCGCTTT  
TCTCCCATCAGCAGCACCTATCCAAGTGGCTCCTGCAGCCGTGTTTCCATCGTAAGGAG  
TTCCGGAGGAAAAGCGGTACATGACCTTCACTTCTCAAACCTTTCTTATATATGTT  
ATTATATAAATTAATATATAATCTATATATTATATACATAGTATAGCATTATAATTAAT  
TCTTCTTAAATCAGTTTAAAACTCACGTGGAAGGCTTTACGATTTGTTTTTCTAT  
TCTTTTTTATTTTTAGAAAGGAACTCGCGTCAATGTAATAGCATGTTATTTTCAATTTA  
TTTTGTTGACAGATATTTAATTTATATTCGAAGATTTTAAAGTCACTTTTTTGTGTTG  
TGAAGCAACGGTAATTTCTGTATAGATGGTGATAACAATAAATGCTTCATGACATTGAAA  
AAAAAAAAGATGACTTAAAAATCT

>BMSB\_RPL9

TTTTTTTTTTTTTTTTTCAAAATTTATTAATAAATCATTATTATCATCTTGTACACAGTTGT  
CTTCTCGGAGACATAAAGACCATCCAAAAACTTTCGGATATCCTTATTTTTGACAGTCGT  
TGACTGTTGGATGAGGGCAGCTGATCTTGAAACATCTTCAATATTGTTACCTCAATAAT  
AAGTTCGCTCTTCTGTTTTGTAGAATTTGTAACAGTAACACCTGGTGCATTTTTACCTT  
CCTAATATATTTCTACCAAGAAAGTTACGGATTTCAATAACGGAATTGCTTTCCGATAT  
GACGCAGTTGATGGGAAAGTGAGCGTAGACTGTCTCATTTTATATAAGAATCCCTTTGT  
AACACCTTAAATCATGTTTTTCAACTTGAAGCAGTTTGAATTCACCATATGGATATCTAG  
TTTGGTGCAAAACCATTTTTCAACTTTAAGCAGTTTGAATTCACCATATGGATATCTAG  
TGCTAAATGCCTGAATGCTTTTTCAAGACACCCCTAGGCTTTAACAGTAAACAATCCT  
GGACTTACATGGCATGTAACCCCATCGGGGATTTTTACGGTTTGAATTAACAATATTG  
CTTCATCTCAGAGAGTTAGGCAACCGAAAAGAACTCTAGCACGCCAACAGCAAAGAA  
CTCAGCAAAGCCTTCTCGATATAGTACTACGAGTATAGTACACCTCCATCTTAAAAATTT  
ACAAAGAGGTATGAACTGAAACCCTTCACTTTAGATCGTACTTATTACAATAAATA  
ACATATCTTTTTAAGATGCTGTACACGTTTGCCAAA

>BMSB\_UBE4A

ATAAATATAAATTTATATATACTTGTAAATGTACAACATGATACAGATAAATATTTATAA  
TGTCAATTGTTTATTCGAGGAACCTGCTTGCCTCTTCTTCTGCTATCCAAGTTTCAATC  
TTTTCCCTAAGTTTCGGTATTCGATTTGACCATATTCATTTGTTAGAGGTGATCTGTTGAAT  
GGTCCGTTTGTATCGCTCAGCAAGTGTGCTGCGATAGTAGACCTATCGATGTTAACCTT  
GATGAAGGAAGTATAACAGGGTCCGTCATTAGCGTTGACATAATCGGATCCAGGAATTC  
TCTGGTGTCTCGGACAGCAGTTCTCATCACCTTGTGTAATAGATGCCAATCTGGCCACT  
TCTTCGGACACTCGTTGCAGCTCCATCACCTTTCATACCGCCACCGACACGAACCAAT

ACATCACTTGCTAATGTAAACAGTTGAGGGCTGTACGAGCGACCATCCTTAGAGACAGCT  
GAGCAAAATTCAGTACTAGAACCTAAATGAATATAAATACCACAAATGCTTTGACTATC  
GCACCAGGGTTAAACATACCTTTTCATGATCTTTACCTTCAAATTTTCTGTGGGT  
CCAACCAATGATACAAAAGTAATTGAGCATGGCAGTAATCCTTTGACCATCATCGGA  
TGGCAAAAATGACTTAATTTCTGAGCTCATATTTCTAAAGTGTGTATCGTTTCTGG  
CCTAGAATGTTATCAAACCTCGTGTCAATTCCTATTTGCTTAAATAATGCTCGTTACGA  
TCTCTCTCGTCCAGTGGCAGCCTTTCCACTCTCTGATCTCTGGCTGTTTGAAGAGTA  
CGCAATTTGCCATATTAGAAAGAGCTTCGTCGAGGAGAAAAATGGCATCGTTCATGAGG  
AGTTGAGAAACCTGAGGAAGAGTGGAGGAGTCACTTCTTCCATGTTTATTTCCGCATCT  
CGAGCGAGCTGTTTAAAAACATCTCTGTCTCTCTATATTCCATAGATAGTCCATGACG  
GTGTACATCGGCCTTCTGAATTTGAACCTTCTGTTCGAAAGCGACGCCCTCTCCAGTCATT  
TCAATTTGAGACGAAAACATTTATAAGACAAAACAACATTTGGGTCTTGTGAGGGTATCG  
ATAAAAAGCCTTTCCCTGTAGAAGACACCCAGAGGATTCGGGTCCAGCGTAGGAACCTGC  
CCTTGATCCCTCGGCAGGAGGATTCGAGGGATTGAGCAAGCTCTGCGCGGAGGTGAGGA  
TTGCTGGCTCGTCTTTGGAACCCATCATGACCAGCAGCAGCGACAGCAGTGGCTCCATC  
AGGGCGAGTCCGCCTTCCCTCAAGTGTTCGCGGAGAGTAGGACTTAAACCAACTCAAATAC  
CATGCCACGCTTTCCACTACCAATTCGGGTATGCATTTGAGTATCGGGGTCCATATTCT  
GGCAGAGGAAAAGTCACTGGCGGTGAATATTGGTGTATAACAGTTCCTTTCTCGCGG  
ACAGGGTCAAGAAATTAATGTATCAGCCAAACAGACGTAGCCACTTCAAACCTGCCAGC  
ATCCTCACCATCATTTGGTTCAAGAAGGGCACATCTCATACAAAGTACCTGGACATCTCC  
ATTTCCATCCTTTCTCTGAATGTTTCTACAATTTCTCTCTCGGTTGAGATCTGGCCTCA  
TTTAAGGCCCTCTGTAATCTTCCGATTTCTGATAAAGTTGCTGAGTCTTTTCGAGTAAA  
ACCCGAACGCTGAGGTCTAATGCTCTATGAGTAAGAAAGAAACATTTGTTATAAAAAGAG  
AATGAAACAGTTGAAAAGGTTTCTTCTCCAGACTCAGTTGGTTGTAACACGCTTTCA  
TTATGCAACGTCGTACAGTGAACCTCTGCATTTCCATTTGCTTCTTTATTTGTTCCGGTCC  
ACCTTAAAAGCGGGATAAGTAGGATCGATTTTAAAGAGTTTCTTTGGTCTTTAACAAAA  
GGCTGTGAAAGCCTTAATAGTACTGATGCCAAATTTATTGAAAAGCCATCACTGCACAT  
CCGACCGCTCCAGGGCTTAACTTGTAGTGGCTGAGATGCGACCCCTGGGAAGATTT  
GAATCCAAGCAACCTCCTATCCACTGAAGAATTTCTTCTAAGATTTGGTGAACCTCGA  
AGAATCTGTTCAATAAGACTATGGAACCTTTACATAGTCTCCCATGGCTGCCATAGA  
TTGTTGTCTAAAGCGTTCAAGCAGCTTCCAAGGGACTTTCAAAGTATTGATAAATCCT  
TCTACGGTCTTTGGAAGACAAGAGAGATTAAGTATCACTCCAAAAAGCGTCTCAGCATAA  
GCTAAACCCCTTTCCGGTATTAGCAGGCATAGAATATGTAACAACGACCTCTGCTAGGGCT  
GGGATGGAACCAATGAACTTAATAAAAATAAATGAGATCGAGGAAAATTTATAACTAAG  
GCACGAGAAAAATCTAAATGAACTTCAATTTAAAATAGGGCTAAATGCATCAAACAAAGTT  
CCTTCATCTTCGTTTAAACATTAATGAAACCAATCAATTTACAAAACCTGGTAACTCGGTT  
GTATCTTCTAGTTTCAAAAAGTGAATGACCTGTCTATAAATATTTTGCAATTTCAAATAAA  
GCAGGCTGTCTAAGAGCAGTAGAAACATTTTCCACCAGTAAGCGGTTAAATTTTCCAAA  
GTTTCTTTTGAAGATTTGTCGTTTACTTCTTATCAAATTTGTTCAATCGTTTGAACAT  
TCAAATAAATATAAATACCTATGAGTTTGAATGACGTGAGCTTCGGTCTCTCATTTTCTC  
AGTTTCCAACTTTGCTTTTAAATTAATGTTTGAAGGATCAGTGAGTAGAATCCTTTCA  
AAAACAGAAAACCTCAGAGTGTCAATGTCAAATGTTGCGGAGTTCCTTCAATATATATT  
AACTGTCTATTTACCTGAGCTTAAAGATAAATTTCTTCTGAAGGGTGAATCCAAAA  
ACATCTTCAGAAAATTTTATGATCTCTTCAGAAAATTTGGTCTTTTTCGCAACCCCACTC  
TCAGGAGGTTTATCGGATTTAGTACTGTTTTCCCATCAGTATTACCAACAATGGTAA  
AAGGGATTTATTTCCATTATCTTCCAGACATCTCTTTTTTTTTTAAAGAAAATATGATTTTAGC  
TACATATATACTTGTAGAGGTTAGGTTTTAGATAAAAAATAAATAAATAAATAAATAA  
CCACTTCTCAGTATTTGAAATTTGATCTCTTCAGAAAATTTGGTCTTTTTCGCAACCCCACTC  
TAAAATCAGAAGACGACCTAATGCTGTCAAGCACTGTAAAACAACCTGTGAAGGTTGTA  
TTCAGAAATTTACATGTAGTACGATCCATTTATATGTTTTCATGTGAGATATGAAATAACAA  
AAGAGGATTTGTAGTCTTGAGAGCTTATTAACGATTGAAACTAGGCATATCACAGTTTA  
TCGAAAAGGAATGTGTTCCCTTAAAATGATATTGATGATTTAAACGTATACTAACACTAC  
ATTGGCGCTGAGGCGCTAATGTTCTAGAAAACAGATTTAAGATATTGTTGATAAGGTAGG  
TTATCAGATTTTTTCAATTATCACTTCTCAGTTACAGCCCGTACTTGACAATTTCCGACATA

TT

>BMSB\_TIF6  
TAGCATGATACCTTAAATCAACCTTCCGTTTCCCCCATCACATAAATGAATTTGACACGCC  
TTCAAGTGCATATTACAAAATTAATCTTATAGCATGATACATACTTCTGTTTAGTAAAA  
CATTTATTTATACCAAGGAATGTTTCTCTAAAGTTGATTTCAATTTAAGCCACTACTGTCG  
ATCAAAGAAGCAGCATGTTGTTAGTAAATGTAGCAGGCTGAGCTTCAATTTAATTTGAAA  
ACACTTTCAATTTACAGAAATTTCAAGTGTAGTGTCCAAACCCACAAAATGCTGACCAA  
TCATTTCACTACCATACCAGCGCAATAACTTCTGATCCCCTATTTATTGTACCTGCGACA  
AGTGGAACCTGTAGTAATGAGGATAGTTCATCTTGGTCTTGAGAAGAGTTTGTGGATGA  
ACCAGACCACCTTGATTTGACAAAACACAGTATGATCCAACTAACAGGTTTGAAGCTACG  
GTTTGTGCAAAATCTTCCACTTCAAGTGTATCGGACAAAATTTCTTCTGTTTCTCTGTCA  
AGATCAGGATGTACAAGGGCTACATAATCATTACACGTAATTTACATTTCTAAAGCTGAT  
AATCTCTCTTCTACCTTTGTAACCTTTACAGATTCAGGTAGAGAATTCCTTAAATGTTGA  
AGCTCTGTATCAGTATTGATTTAGGAACAAGAAGCCCATGCTATTACCAACACACATC  
CTTCCAATTTCTGACCTTCCACTGCTAGAGAAGCATGAATAACGGGAATAGTTTCTCTAAC  
TCTGCTTCAAACACTGTAAAAATTTTCTGAACCACCTATTGCAACTAACAGTAAGCA  
TTAGTTAATTTACTAAAAACTCCGACTTCATTTATTTTTCGAATTTGCACTTAAACAGCC

ATTTTAATAATAAATCACAACGAATTTGGTTAAGACACTTAAAACCATGTATCAAAAAT  
CGACACAATACCATGCAACAAAAATATAAACACGTGCGGCAACACGGCATCCAATGGAGTT  
CTTAAAGATTA

>BMSB\_ ARL2

CGTCCACGTAATCGTTGCTCTAAGTATATTCTGCCACCGAATTTACTGTGTACTTA  
GTTCTCGTACTAATCGTCTGGAGTCAATTTAAAAAATTCATATCTTTATTTTCAATTT  
TGCTGTGTTTATGATATATTTTCGGATCACTGAATCTATTGTGCGCTACTGGACAGGTA  
TTCAAGTGTACTTTTGGAAAAGATTAGTGTTCCTCAACCATCTTAATTATGTCTTTTCAAG  
TTAAGTTATATTATATAAAGTTATGCTGATGAAGATATTGCTGTTAACTAACACT  
AATTTTCAAACTTTGTGTTGTGGTATTTATTTTTCACCAAAATGGGCTTAACTTTGTCAA  
GTGTTTGGCAGCTCTATGGGAAAAACAGATGAGAATTCCTATGGTTGGATTGGATG  
CTGCTGGAAAAACAATTTTATACAAATTTAAGTTAGGTGAAATTTACTACAATTC  
CTACCATAGGTTTCAATGTTGAAACTGTTGAATATAAAAAATATTGCTTCACAGTTTGGG  
ATGTTGGTGGTCAAGATAAAAAAAGACCATTATGGAGACATTACTTTCAAACACACAAG  
GATTAATATTTGTTGTTGATTCTAATGATCGAGAAAAGAAATTCAGAAGCAGAAAAGAGA  
TTCAAACATGTTGCAAGAAAGTAACTTCGAGATGCAGTTTGTGTTTATGCTAATA  
AACAGATCTTCCATGCTATGAACCCATCAGAACTTACAGAAAAGTTAGGTTTGAAC  
AGCTTAGAAATCGCCAAATGGTTCATTGAGGCTTCATGTGCTACCCAAGGACATGGTCTAA  
CCGAAGGCTTAGATTGGCTTTCGAATGAGTTAGCAAAGAGATCATAAGAGCCAAATAAAA  
GAAAGAAGTACTGATCTTAAGAGAAGAAATTTGATGTTGAGCATTTTGAATTTTATCTATG  
TAAAAATAAAAGTGTGTTAGTGACAAGGTTAGTCTAAGAACATTGTTAAAAGAAGGATTGA  
CATTTCAAATATTAATGCTCAAGCCTAAGCATATGATTAAGAAATACATACAAAGTGA  
AGATTTGGTACCGATTTTGGTAAAAAATAAACAACCAAAACCAATTTTCAACAA  
AACTGATATACCAAATCTCTATACAAATTTTGTATTTTACAGTTTACTTATGATTTG  
CCTTTGGCTTTGATTTATGTCATGAATAAGTATATTGTTTCTCTTTTGTAACTGATTGTT  
ATTGGTTAGCTAATCAATGTGTTTGCAGAGAGAGATCATGATTTTATAAATTAATAA  
CAATTTTCTTTGGATGTATTTTATTATTAAGAAGTGACTGATAATAACA

>BMSB\_ ARP8

CTTTCAACGTGCCCACTTGTGAAGTCGTTTCGGGATAACCATTTAGCACCTCTATTGGTT  
ATAAACCGAGAAGGTTTATGTTTACAAATTTTAGGCTCTTAATTTGTTAATTTTGTGTTAA  
AATGACTACGATTATAGAACACATTGAAGAACCAGTGCAATGCAGACGCAAAATATAAT  
CATCATTATCCAGGATCCCTTATGTCAAAATCGGTGCGTGCATCTGACTTGAATCCCTG  
CACAGAACTCCATGCAGTTGCAAGAAAAGGCTTCTGGAGGCTTGTCTACCAAGATCC  
AATATTGCTCCTCTGTTCCCAAAGTGAAGGATCTTGAAGCTGAGATGGATGCTTGTGCG  
GCTTCAGGTGCTCATACCTTGGTTCCTGTACAATGTCCAACAATCAGCGAAGGTATGT  
TACCCCACTCAGCAAAATATCCGAGCTTAAATAAAAAGGTTATTCCTGAAGTATGTTGCTGA  
AATTGGTCTAGCTGGGTTAAATCAGAGGAAAACGTTGTGTTTGGTGTGTTTGTGCA  
TCTTAATCCTGCTTTGGGTTTTAATGTTCACTTCCCTATGAAACGAGGTGATCTTAATAG  
ACATTCAGGTGTAGGAGGATCTCTGACTGGTGTCTTGCAGATTTGCAAGCTATATGGTC  
ATGGGTCATTAGTGTTCGATGGGATACCTCTTCAAGATTTAAAGAATTATAGAGCTGT  
TCTTGTATACCTGACATTTATAATCGACAATATTTAAAAGAATACGTGACACTTTTACT  
GGATATGGGATTTTCTCATGTTTCATGCTACAGGATCATGTAGCAGCCACATTTGGTTG  
TGGGGTTGGGACGGCTTGTGTTGTTGACTGTGGACATTTCAAGACATCAGTGTCTTGTGT  
TGAAGATGGTATATCTCATCTCAGATGGTGTGATAAAGTGAAGCGATCATTGCTCCATATCTTTA  
AGAATTTGTGATGCTGACTGGCCCTAAGCAGATATCAACTCAAGGGGCTAATACAGGTGA  
TTCAATTTATGATAAATGTTGCTTGATAAAGTGAACCAAGATGCTTGCATATTGACTT  
AGATATTTGTGTTGCAAGGAGTTTACATTTACGGTTAATAAACCGGAATCACCTGTTTA  
TAAATATACTATCTCATCTCAGATGGTGTGATAAAGTGAAGCGATCATTGCTCCATATCTTTA  
AGAATTTGTGATGCTGACTGGCCCTAAGCAGATATCAACTCAAGGGGCTAATACAGGTGA  
TTCTACTGATCCACATGATGCAGATTATTTACGAGAAAACAGGAGGAAAGAAGGAATGTA  
AGTTGAAGCAGACGAAGAGCTCGCTGAAGTGGAGGCATCTGGCTCAGGAGGTTCTGTAC  
CAACGAAGGAGGCTTCCCTTGTGACCAAGCTATTTTACAGAGCATACAAAATGTGG  
CTCTGAAGATCTAAAAAGAAAATGATTTTATCTATACTTCTCATTGGAGGAGGTTTGA  
ATTCAAAGGAATGATATCATGGTTAGAGAAGAGCTTTCTCAACAAATTCCTATTCTCTCC  
AAAAGATGACGGTGAGCGAAGTGAATGGAGGAAAAGGATGCTGCGGCTGTTTGGAAAAGG  
GGCTGCCATTTCTGCTGCTCAGAACTGCTGGCGAACTATGGATTTCAAAGATGAATG  
GGTTAGGTTTGGAAATAAACTGATACGAGAGAGAGGCCATTCCTTTGGTAGCTAATAGT  
CTTACCTTTAATTTGTATATTATC

>BMSB\_ FAU

CTCAACTTGAAGGAACATTCTAACTAAGAACATAAATGTGTTCACTACATGTTCCATG  
GAGTGATCACAATGGCATAAGCTCTACGAGCCAAGTCTCAATCAAACCTACTGGAGAACC  
GCCATTTGCTTAGAGAATTTGTTGGATCAAATGATTTCTCGGAGAGGAAAAGATCAGCCT  
TTTCGTTCTGGGCAATCAAACATTTGGTAGAATGTTTCAATCTGCACACTAGGATC  
TATTAAGTCCGAGTTCCAGCATTGAAGGGATACCTTATGAACCTGTTAGTTTAGCAGC  
ATCAGGAATCCACTCCAGATGATATGTTTGTATCTGATTGGAACACAGAATCTTGA  
CCTCACAGTTCTTTACTTGGAGGTAAGTCCACGGTTCACTGGCTAGAGCTGGTAAAGT  
GAAGGGTCAAACCTCAAAGGTTGAAAAAATGGAGAAGAAAAGAAGAGACTGGACGTGC  
TAAAAGGCGTATCCAATACAACAGACGCTTTGTCAACGTTGTACAGACTTACGGTAGAAG  
GAGGGGGCTAACTCTAGGCTTAAAAACA

>BMSB\_ TBP

TTTCTCTTTCAGCTGGTGGACCAGCATACTGTAGTGTGAGAGGATTTACGAGATGTGA

ATTTCCTACTTCAAAGACCCAGTGACCAGTCAAGTGTGGAGGGCAAACCACAAGAGAAG  
GTAATGGTGCACAATCAGCCTTCTTTGTGTCTTATACTTTAGTCTCTATCGTAATGGT  
CTCCAGCAAGAATAACAGATAGATTGGAGAGTCTTCCAAGCCCATATCATACAAAGTA  
AACCGTGGAGTTTATACTTATTAAGAAAAGCTAACCAATTAAGTCCAGCCTGCTGATAGG  
ACCGCAATTCAGTGAATCGGAACTGGAACCTTGTAAATCGGTTATAGTAGATGGGTGA  
AGAGCTGCTCAACAACTGGCGCTGCTCATTTTTAATACCAACAGCCTAGGGGTAAGTT  
TAGGTGGGTTGGAAATCCACTTTCTAGAGGCATAACCTGAATCAAATCGCAATGTAT  
GAGTAGCAAGAGTTCTGATGGTTTCATTGGATCGCTCATTCTCCTAATAGTGGTACAA  
TGAGAAAAATACATAAGGCCTACAACCAATTGTAATTTTTCAATAATAACAGTAACTG  
CTTCAATAGAGCCTCTTCTTCTAGTGTATCGTTAACAGCAGACAACATAGGTATTACAA  
AGTCAATCACTACATCCATCACTGTATTAGGCTCTATACTTGAAGTTGTGCTAAACAAC  
GTGAAGCCATATGTCTAATAGCAGAAAAGGGATGGGAGAGTAAACAAACCAATGGTTTA  
AACATAGAAAAATTTGGGGTAAAAGAGATTTATCAACTGAAGGGCAAGTAACCTTAAAA  
CCTGTAGAAATCCCGATTAAATGTTTCGATTTCAATTTGTAATTTGTAATTTGTTTCC  
AGATGGTATCTGGCTTGACTTTTCTAATAAATCACCACAACAGCCTGCCAAAGTGTG  
GAATGCTACAGTAGATTTTGGCCAAAACGTTAGTTATAGTTTCCAAGGCTATTGTGTA  
CACCTCTCTTTGAATTAATGATTTTCTGAGCATTATCTTCTTGATAATATCCTCCA  
GCTGTACCTCCATCGCTGGTGGCCTTCTGGGCTCTTCCACTTGATGACAGGCATCTCC  
TCGAATAGCTCTTCTGCACCTTGTAGTTGTTCAATAATGTTATAATAGAGGTGCGTA  
AAATATCATCATCAAAGGAACCTAGGGCTTTATCATTGTTAAATGAACAGCTTTCAGCCT  
TAGATGGAAGATCCTGGGAGTAAATTCAGTGTGAGATCTAAGAAATGTGATTAGATTAG  
TAATGATCTTTGCATTAGGGCAGGGTCTCGCTCCACACAACCTTTGAACCAACAAAGCTA  
AATGTTTTGCAGAGAGTCTGCAATTTCTCATTCTTCCAGTTTGATACTGTCCATAA  
GTGGCTTTACTATTGGACTTAGCTTCTCAGGTAGTTCTTTCAGCATAACAATGGCTCCTG  
CCAGTGTGCTGAGTCAATATATGATATGATTTCTGTTTCTGAGGGTGTGTTGAAACAG  
CACTACGAATACATTTCTCCTTTCCTGTAATGTTTCTAATAACTTTGGTTTTAGTCTAC  
TTTTTTCAAGCAAGTCAAGCCTATAGGTCCCAAAAGATGTTCCATTTGATCTAAAGTTA  
AAACATTTGCACCTGGTAAATCTCATCAGCAACAACCTTTGTAATGTTTCAACAAAGCAAAA  
AATCTTTGACATCTTGCAGTAAATTTGAGTAAGAGAGTCCAATCTCATCATAATAACAG  
TTTCAGTCAAGCATTCCATTAATTTGACAACAGCGGTTTTGGAGAAGGTGATGGAAGTT  
CATGCAAGCCCATCTGATATAACTAGACCAACAACAACCTTTGAAGTGCAGACTTAC  
TGTTCAAGTAAACTAATATCACCTTTCACATAACAATCTATAGGAGACTCCATTTCTCTG  
TATAACAATCCCAGGAGCCGGTTTCAATGAACTTAGATAAGTATCCAAGCATTTTTG  
TAACAGTAAATCTAGCATGAGAATATCTTTTCTCTAACATTAACAGGTACTGTCTCAT  
TTCCACCAATATACTGTTTCATATCACAACTGCTTGATCTTGTCTTGTACACAACGGC  
CGCTTTTCAAAGGACATGATGCTTCTTCTTCTTAGATGATGTTTCGCTTGAATAAAAAGACT  
GATCAAATGGTAAAGCGGGAGGTTGCATAGCCAAACATAGCCATCTGTTATATAAGGAC  
ACGCAGCAACTAGAATATCATTAGCTTACTTTGTGCGAGAATCTCCTTCCAACCCAT  
GGACATTTGTCATGGGTTGCCTGATGATGCTCCAGAAGAGCAGCTGATAAAGATATCTAA  
GAGTGGCTGAAGTAAAGCAGCAAAAACCTAGCATGCTGTAAGAGATGATAAAGTGTCA  
AAGCAGCAGAGCGAACACTAGTGTATTATGTTCCAGTAAAGACCAAACTCTCATCACTA  
ATTCACTTACAGCGGTACAGCACTTATTCGAGAATGACATTAGGTTTAAAGAAAGATT  
GAGCTAAAAGAGGTACAAAAGTGTGATGCTGGAGTGAGATCATCCAAGTCCGGTACTA  
ACAAACATAAAGTATTGAGAACATCAACTGCTTGTCTGAAACTTGAAGCATAAAGT  
CAACAGATGTAGCTAAGGCTCCAGCGGCAACTGCACCAACATCGTCCATAGCATCTTTCA  
GTGATGTATGCACTTAGGAAAGCACAAGGAAACAGCTCGACCAATAAGTCTGCGCTCA  
CTGCAAGATATATTAATCTTAGTAAAGCTCCATGCTCGTTTCCAGTCTTTTTGTT  
CTAATAATTTCAACAAACCTTAAATATCATGAACACTTTGATGCTCATTAATAATAG  
CAACAGATCTTAGGACTTGAACAGGTTTACGAACTGGAGCTACAACCTGGTCAAAAA  
CAAATCACCAAATCTATCTAGTGAAG

>BMSB\_GUS

AAAATTATAATCGGATTGTAAGATTACATCGATTTACAAAGGAGTTTATTGTAT  
AAAATAATAAATCAATTGCCTTTTAAAATTAATATGTTTTGACTGCTGGGACGTAACA  
GGGGCAGTGTATTGTTCAAGTATCAGGTAATCGAAGCCATCTAATCATGGGCAAGC  
TGCATGTATCTTTTCTCAAATGCATAGCTGCTGCTTTTGGTTGTGCGGTTTCTGTAAAG  
ACACCTTTCATGTTTCTCGACTCGAGTGTGCTTGTATGATGCTTAAAGTCTGCAAG  
TTCCAAATCATCTCACCATGAAGAACTATTATTTTTATTCCCTAAGAGTGTCAAATGCT  
TTAAAATGTTCTGAAAGCAATCTACTTGGTACTCTTCAAGCCATATGTAATCTGGCATC  
AGGTGAAGTCTGTATCGTATCAGCACCGTATTCAGTGACAAGAACAGGTTTATTGTGC  
TTTGTGCTCCACGTTCTGCTTCTGCTTCAAGATTATATTGTATCACTTCAAGTTTTCT  
GGATATGCATACCAACCGTTATATCGATTGAACTAAGGATGTCAACAACTTGTCCAGCA  
TAGTCACTGCTGGTCTTGAATCATAGCTATTGCTACTGGACGCTGGACATCTAGTTGC  
TTCACATGTTTTGCCACAGAGCTGAAATAATCAGCAGAAGCTGGATGTTGAGTTCTAGGT  
TCGTTGGCAATACTCCATATAATAACAGACGGCCTGTTCTTATCACGTTGAATCAGCTCT  
GTGAGAGAGTCTTTGTGCTTTTGAAGTAGATCTGATGAAAAATAATCTATATTGACACCA  
GGGCATTCATCAATAATCATGATTCATTTTCATCAGCAAAGTCCATGATTTCTTTCAGCA  
TAGGGATAATGAGATGTTCTGTATGAATGGCTCCTATCCATTTCAAAGGTTATAATCT  
TTAGTACTAATGGTAAATCTAATCCCTTCTCGAATACTGAATCTTCAAGCTGCTGCA  
AATCTCTCAAATAAACAGGTTTGCATTTATAAGGAACTTGAATTAGTCCAGTGTATT  
GTTCTTATTCAAATACGTTGCCGATAAATATCTGTACATGATTAATCTTTGTGTTAAA  
CTTAAAAGGCGTATCTCAAGAGTATACAAGTAGCCTGGTTCTGGATTATCATGTAAGGC

CACCATAGTTTTGCATTAGGAATCTCTGTATAACCGTTGAAACCATTTTGTTC AATTCTG  
TTATTTAAGGTTACTGGTTACGGGTGATCCATCAGCATCAAACAACCTACCCAACAGCCT  
ACTGAATTTATATCTTTCCACTGTAGGTGATGTTGTAGTATACAATACCTTTGGAG  
CCATTTATGTGAGTATAGACAGTAAACATCATCAATGTACAGATCTGGTGTAGTATATAA  
TGAACCGATCTGTGAATCCAGCATAGTTGAAGAAATCAAATGTGTATTCCTGAACAGTT  
TTTTCTCCACTTAATGTTGGTATCTTACTTAATGATCCTTGAGGCACAGTGGTAGGACTT  
AGTGTATTGTCAACTGCAACAGTTATTCTGTTTTTCGGTTCATA

>BMSB\_CAT

ATAATCACAATCAGTATTTCTTAACACTAAGTACACTAGAAATATTGAACATTTGTAAG  
TGTTATTTAATCAACCTTTATTATTTAAAATAAACTACTTTTTATTATATATTTTC  
TAACTTTTTTTGATTATTCATATAGCTGAATAAGCTTGAATTTAGCTTGAAGCATAGAT  
CCAAATGTTTTATCTACTTTGAAGAAGTGACCAAGTTGTCTCTCCTGGATAAATGATGAT  
GCCCTGCGAAGATGATTTGCAATATTATTAACCATTCTCTGCCTCTCATCTTCGGAAAGC  
ATAGTCTGCCACATCATCGCTGGTTGGCTGTAGTTATCATCGCTGAGGAGTCATACCTG  
TCGATATCTCCAGTGGTCGATATTGGTGGAGGTCTAGCCCTCTCACTGTTGGCCATATGA  
ACAAAGCTGCTTGGATAGTAGTTAGGTGCTCCATTCTGGTTGTCTCTGTAGCACATCTTA  
CCGTCTCTTTCGCTATTGAATACTGGGCTTCTGAAAGGTGAATTTACTGGCAGTTGTTGA  
TGATTAGGCCAAGTCCGGTGGTGTGTGTCAAGGTAGGAGAAACAATCGTCCCTGAAGC  
ATCTTATCTGGACTTGGTTCGATTCCTGGCACCATGTTACCTGGGTGAAGCCTGCTTGC  
TCTATGTCTGTGAAATAGTTGCGGGGGTTTTTATCAAGTGTAACCTGCCAACTTCGATC  
AGAGGGAAATCGTCTTCAGGCCAAATCTTGGTTACATCGAAAGGGTCCACCTGAACCTC  
TCAGCTTCCTTGAACCTCATGACTTGGATGTAGAAGTCCAGGAGGGTACTTTCCAGG  
GCGATGTTGTTGAGAGTCTCGGATGCCATAGTCAGGATCGACTCCAGCCAACTTCTGG  
GCCCTCTCCACTGGGAGGCCTCTTTCTCCTTGCCTGTCTTGTAGTGAATTTGCAGTAG  
ACAGGTTCAATTGTTCTCATTGACCAGCTTGAAGGTGTTGGAGCCATAGCCACTCATGTGC  
CGGAAGCCATCGGGGATCCCTTGTCTGAGAACAGGATCATCACCTGCATGAGGGACTCT  
GGTCGCAAGCTCAAAAAGTCCCAATACATATCGTAGTCTCTCAGATGGGTGACAGGGTTC  
CTCTTCTGCGAGTGGATGAATGAGAAGAAAAGAAGAGGGTCCCTCACGAAGAAGACCGGG  
GTGTTGTTTCTACCAGTCCCATATCCCTTCATCAGTGTAGAACTTGATGGCGAACCCCT  
CTAGGGTCTCTGACTGTGTCTGCGCTGCCCGTTTCACCGATGACGGTAGAGAACCTGACT  
AAGATGGGAGTCTTCTGCCTACCTTTGAGAAGACCGTGGCCTTGGTGTACTGGGTGATG  
TCGTTAGTGACCACGAAGTAGCCGAAGGCTCCTCCACCTTTGGCGGTACCACCCGCTCC  
GGGATCCTCTCCCTGTGCAAGTGTGCATCTCCTCGATGAAGAAGGTGTCTGGAGGACG  
ATTGGCCCTCTAGACCACCCTCATGAC
